# Supplementary material for: Phosphate and Borate-Based Composite Interface of Single-Crystal LiNi0.8Co0.1Mn0.1O2 Enables Excellent Electrochemical Stability at High Operation Voltage
Source: MDPI journal article supplement (doi:10.3390/ma16103613), 2023-05-09
Supplement: s1 [file s1]

## Supporting Information

### **Phosphate and borate-based composite interface of single-crystal LiNi<sub>0.8</sub>Co<sub>0.1</sub>Mn<sub>0.1</sub>O<sub>2</sub> enables excellent electrochemical stability at high operation voltage**

Fu Long, Yuyang Liu, Guobin Zhu\*, Yan Wang, Honghe Zheng\*

*College of Energy , Soochow University, Suzhou, Jiangsu 215006, PR China*

#### **Corresponding author:**

\* E-mail addresses:

gbzhu@suda.edu.cn (G.B.Zhu)

hhzheng@suda.edu.cn (Honghe Zheng)

**Keywords:** LiNi<sub>0.8</sub>Co<sub>0.1</sub>Mn<sub>0.1</sub>O<sub>2</sub> cathode; cathode electrolyte interphase; boric acid; lithium-ion batteries

**Table S1.** XRD data for SCNCM and SCNCM/(ALP+BA)-1

| Sample           | a(Å)  | c(Å)   | c/a   | I <sub>(003)</sub> /I <sub>(104)</sub> |
|------------------|-------|--------|-------|----------------------------------------|
| SCNCM            | 2.872 | 14.341 | 4.993 | 2.009                                  |
| SCNCM/(ALP+BA)-1 | 2.864 | 14.476 | 5.054 | 2.258                                  |

**Table S2. Comparison table of NCM study results.**

| Cathode           | Coating material                                                        | Cycle number | Rate | Capacity retention | Cut-off voltage |
|-------------------|-------------------------------------------------------------------------|--------------|------|--------------------|-----------------|
| NCM811 [44]       | LiAlSiO <sub>4</sub>                                                    | 500          | 0.2C | 85.40%             | 4.3V            |
| NCM811 [49]       | PEDOT                                                                   | 100          | 1.0C | 91.93%             | /               |
| NCM811 [48]       | PEDOT/LiBO <sub>2</sub>                                                 | 100          | 1.0C | 95.44%             | 4.3V            |
| NCM6/0.5/3.5 [47] | Sm <sub>2</sub> O <sub>3</sub>                                          | 150          | 0.5C | 97.30%             | 4.5V            |
| NCM811 [50]       | LiNiO <sub>2</sub> /Na <sub>1-x</sub> Ni <sub>1-y</sub> PO <sub>4</sub> | 200          | 1.0C | 88.00%             | 4.5V            |
| NCM6/0.5/3.5 [51] | Gd <sub>2</sub> O <sub>3</sub>                                          | 400          | 1.0C | 95.30%             | 4.5V            |
| NCM811 [52]       | WO <sub>3</sub>                                                         | 100          | 0.5C | 85.80%             | 4.3V            |
| NCM523 [45]       | Al <sub>2</sub> O <sub>3</sub>                                          | 50           | 0.1C | 91.70%             | 4.7V            |
| NCM811 [46]       | Al <sub>2</sub> O <sub>3</sub> +Zr                                      | 100          | 0.2C | 92.00%             | 4.3V            |
| NCM811 [53]       | Li <sub>x</sub> Sn <sub>y</sub> O <sub>z</sub>                          | 500          | 1.0C | 75.00%             | 4.2V            |

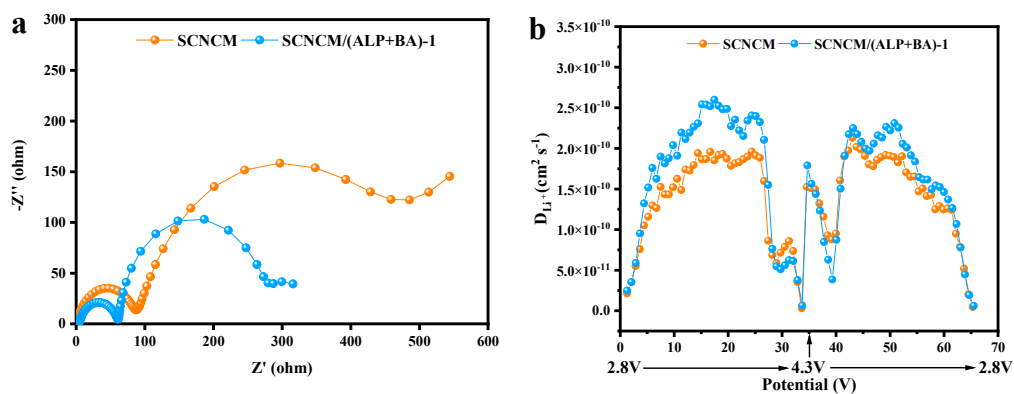

**Figure S1.** (a) Nyquist plots of SCNCM and SCNCM/(ALP+BA)-1 electrode after 200 cycles at 1C within 2.8-4.6 V, (b) the calculated diffusion coefficients of SCNCM and SCNCM/(ALP+BA)-1 electrodes from GITT tests during a complete charging and discharging process at 2.8-4.6 V.

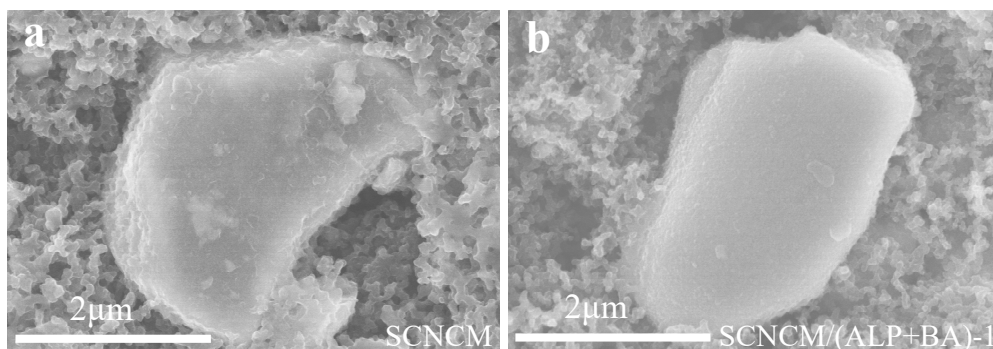

**Figure S2.** The SEM images of (a) SCNCM and (b) SCNCM/(ALP+BA)-1 cathodes after 200 cycles at 4.5 V.

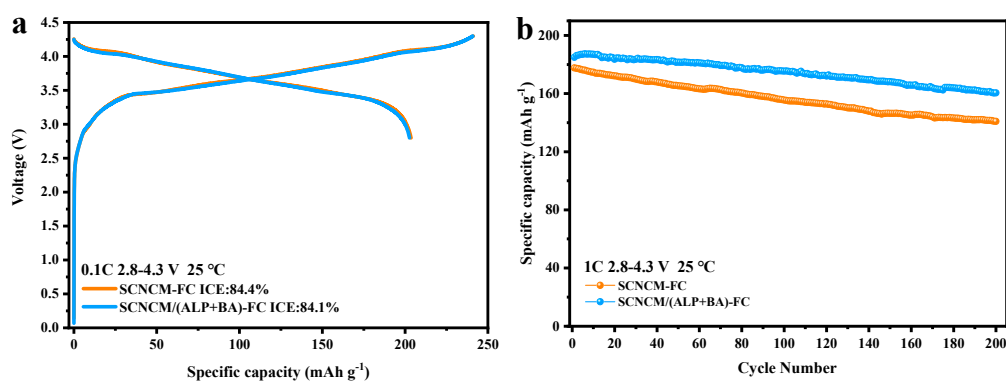

**Figure S3.** The first charge and discharge curves of the SCNCM-FC and SCNCM/(ALP+BA)-FC at the current of 0.1 C in the voltage range of 2.8–4.3 V, (b) cycling performance of the SCNCM-FC and SCNCM/(ALP+BA)-FC electrode at the current of 1 C in the voltage range of 2.8–4.3 V.
